# Supplementary material for: An Immunosuppressant Peptide from the Hard Tick Amblyomma variegatum
Source: PubMed Central journal article supplement (PMC4885048; doi:10.3390/toxins8050133), 2016-05-03
Supplement: toxins-08-00133-s001.pdf [file toxins-08-00133-s001.pdf]

# Supplementary Materials: An Immunosuppressant Peptide from the Hard Tick *Amblyomma variegatum*

Yufeng Tian, Wenlin Chen, Guoxiang Mo, Ran Chen, Mingqian Fang, Gabriel Yedid and Xiuwen Yan

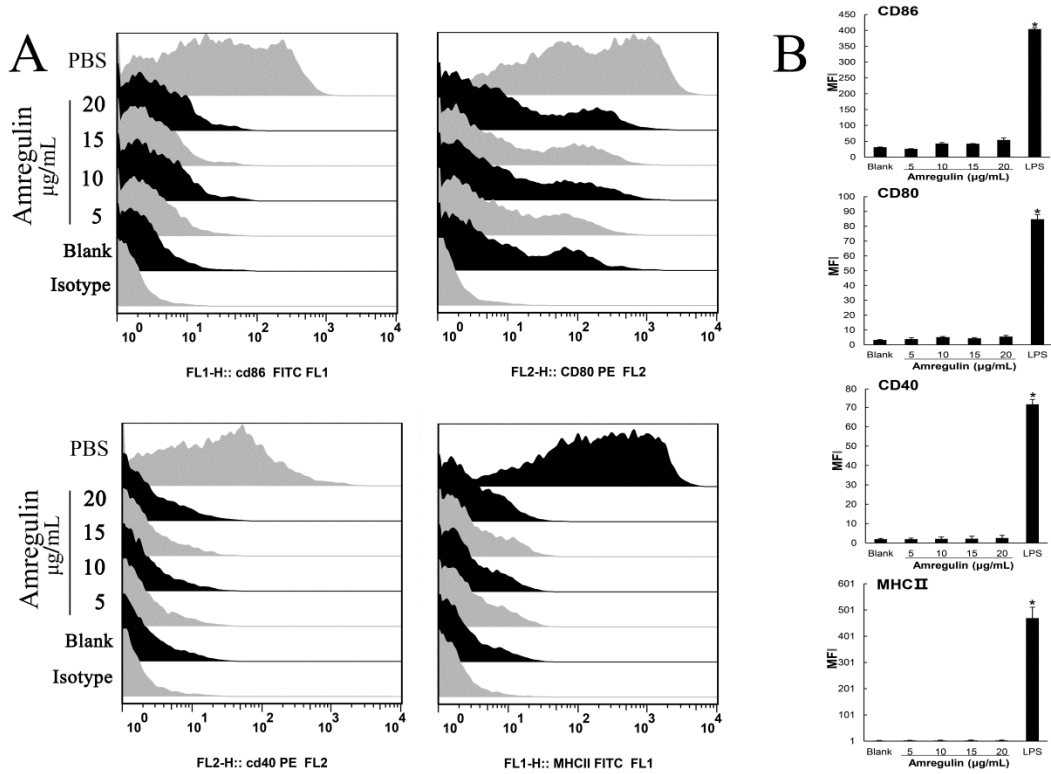

Figure S1. Effect of amregulin on dendritic cells; \*  $p < 0.05$  ( $n = 3$ ).
